# Supplementary material for: Annotating Spike Protein Polymorphic Amino Acids of Variants of SARS-CoV-2, Including Omicron
Source: Biochem Res Int. 2022 Apr 11;2022:2164749. doi: 10.1155/2022/2164749 (PMC9017565; doi:10.1155/2022/2164749)
Supplement: Supplementary Materials — The probable biological function of each residue was annotated using the guidelines shown in Supplementary Material 1. The dataset containing the representative of each variant used is available in Supplementary Material 2. [file 2164749.f1.zip]

Archive with 2 entries (2 files):
- 2164749.f1/Supplementary Material 1.docx
- 2164749.f1/Supplementary Material 2.txt
